# Supplementary material for: Synthon polymorphs of 1 : 1 co-crystal of 5-fluorouracil and 4-hydroxybenzoic acid: their relative stability and solvent polarity dependence of grinding outcomes
Source: Royal Society of Chemistry journal article supplement (doi:10.1039/c4ce00221k), 2014-01-01
Supplement: c4ce00221k1.pdf [file c4ce00221k1.pdf]

**Electronic Supplementary Information for**  
**Synthon polymorphs of 1:1 co-crystal of 5-fluorouracil and**  
**4-hydroxybenzoic acid: their relative stability and solvent**  
**polarity dependence of grinding outcomes**

**Song Li,<sup>a,b</sup> Jia-Mei Chen,\*<sup>a</sup> Tong-Bu Lu\*<sup>a,c</sup>**

*<sup>a</sup>School of Pharmaceutical Sciences, Sun Yat-Sen University, Guangzhou 510006, China*

*<sup>b</sup>School of Life Sciences, Sun Yat-Sen University, Guangzhou 510275, China*

*<sup>c</sup>MOE Key Laboratory of Bioinorganic and Synthetic Chemistry, School of Chemistry and  
Chemical Engineering, Sun Yat-Sen University, Guangzhou 510275, China*

**(a)**

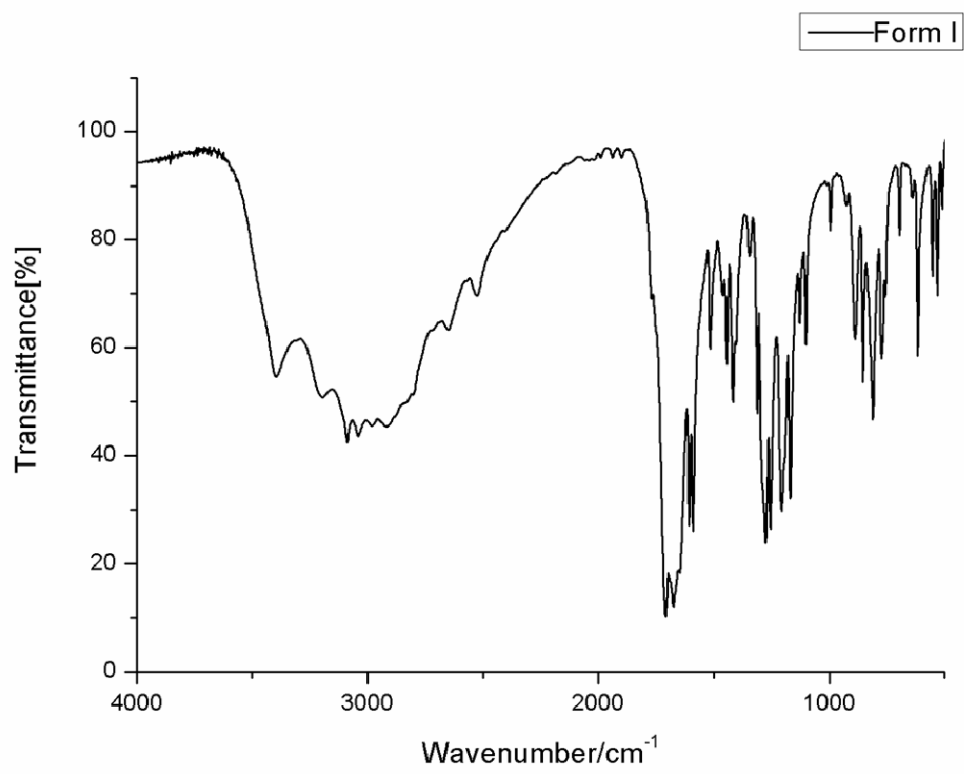

**(b)**

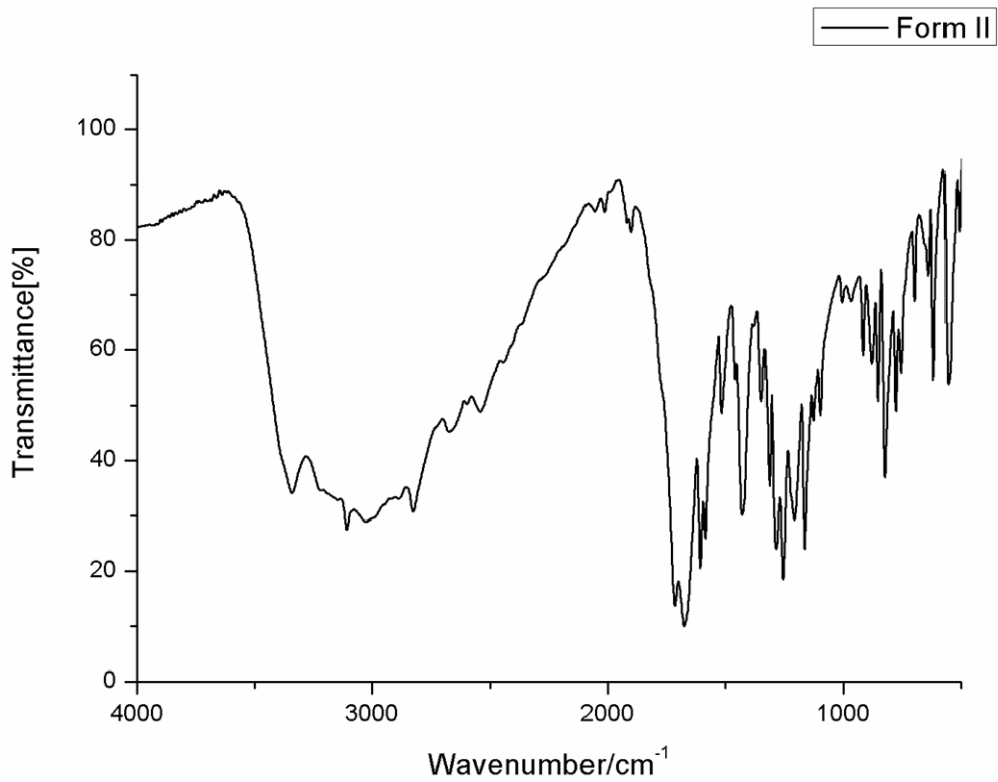

**Fig. S1** IR spectra of 5FU-4HBA co-crystal polymorphs: (a) **Form I** and (b) **Form II**.

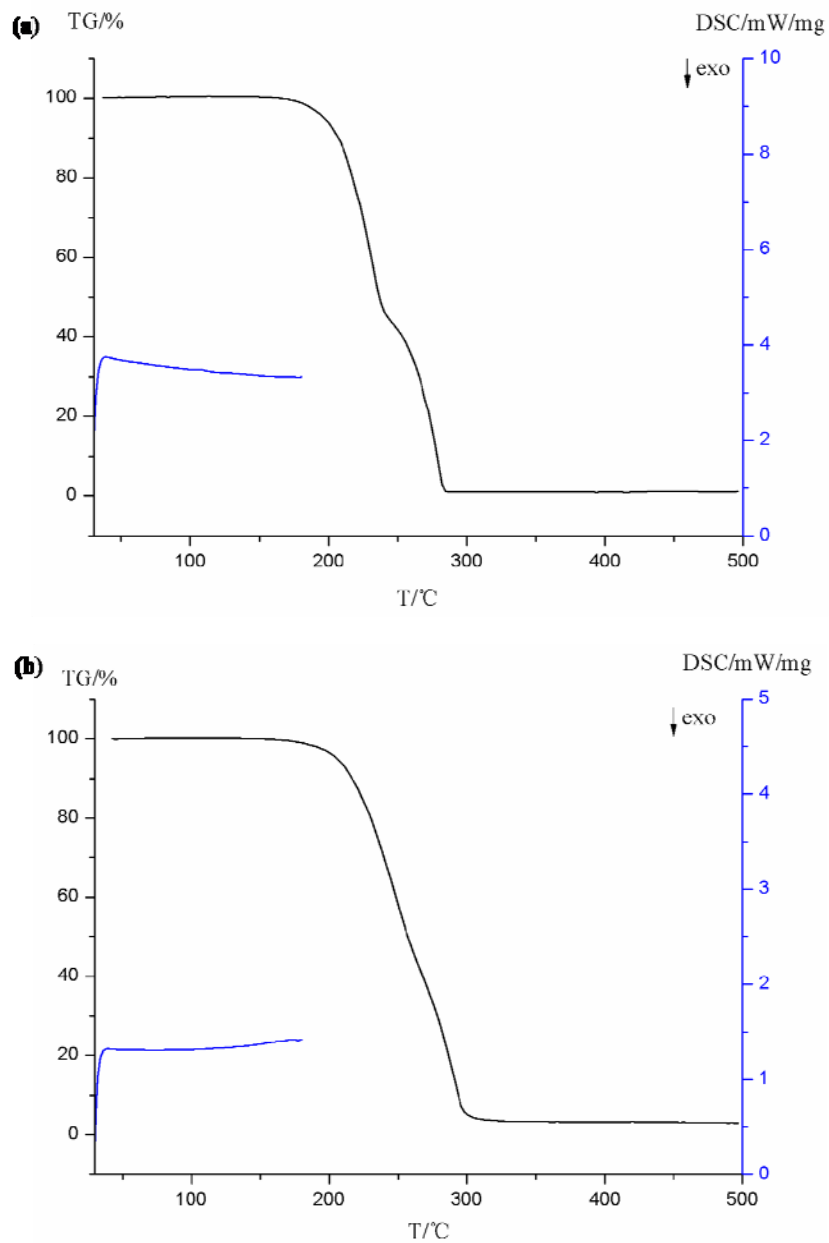

**Fig. S2** DSC and TG curves of 5FU-4HBA co-crystal polymorphs: (a) **Form I** and (b) **Form II**.

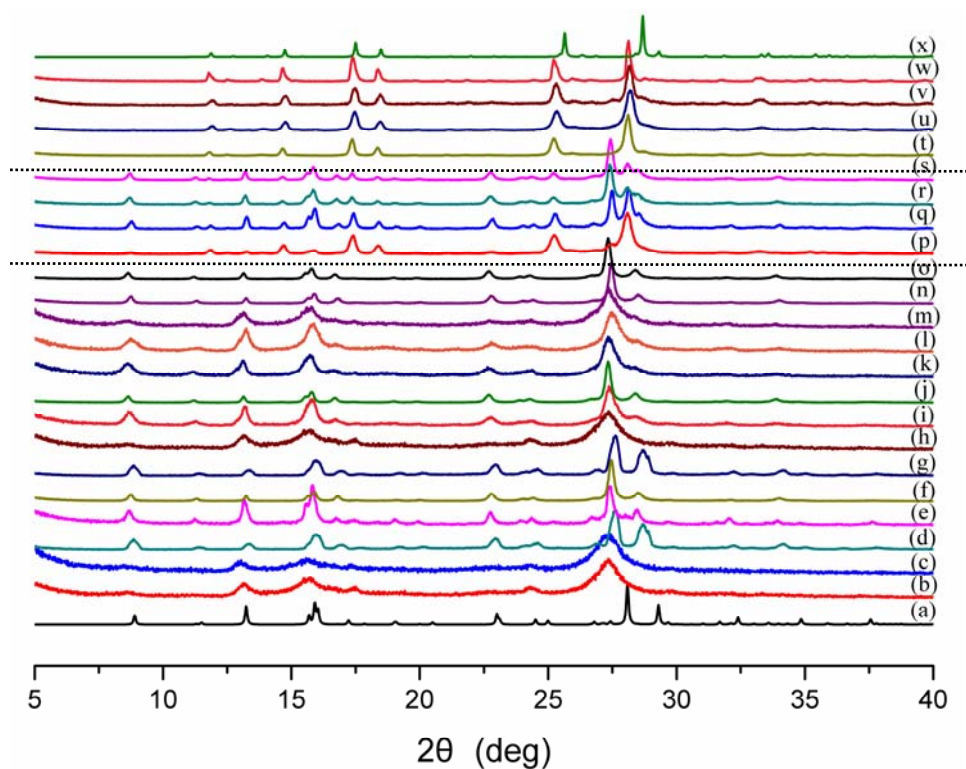

**Fig. S3** PXRD analysis: (a) calculated pattern of **Form II**, measured patterns for the outcome of SDG of 5FU and 4HBA (1:1) with various solvents, including (b) n-heptane, (c) 1, 4-dioxane, (d) benzene, (e) o-xylene, (f) p-xylene, (g) m-xylene, (h) chloroform, (i) ethyl acetate, (j) methyl acetate, (k) tetrahydrofuran, (l) methylene chloride, (m) sec-butyl alcohol, (n) n-butyl alcohol, (o) isopropyl alcohol, (p) butanone, (q) acetone, (r) propanol, (s) ethanol, (t) methanol, (u) acetonitrile, (v) ethylene glycol, (w) water, as well as (x) calculated pattern of **Form I**.

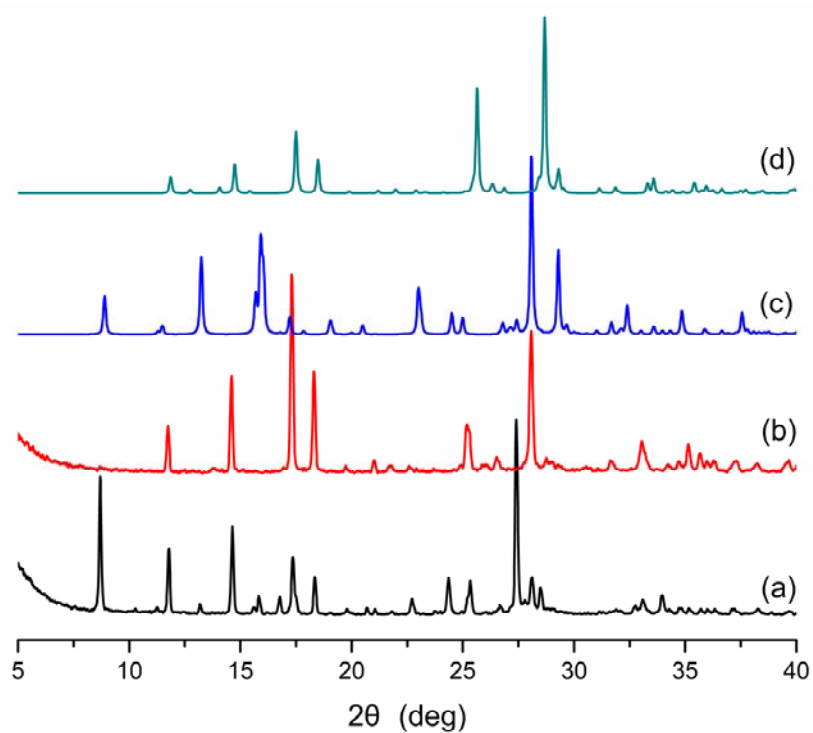

**Fig. S4** PXRD analysis of a 1 : 1 mixture of **Form I** and **Form II** before (a) and after (b) the slurry for 24 h in water overlaid on the calculated patterns of **Form II** (c) and **Form I** (d).

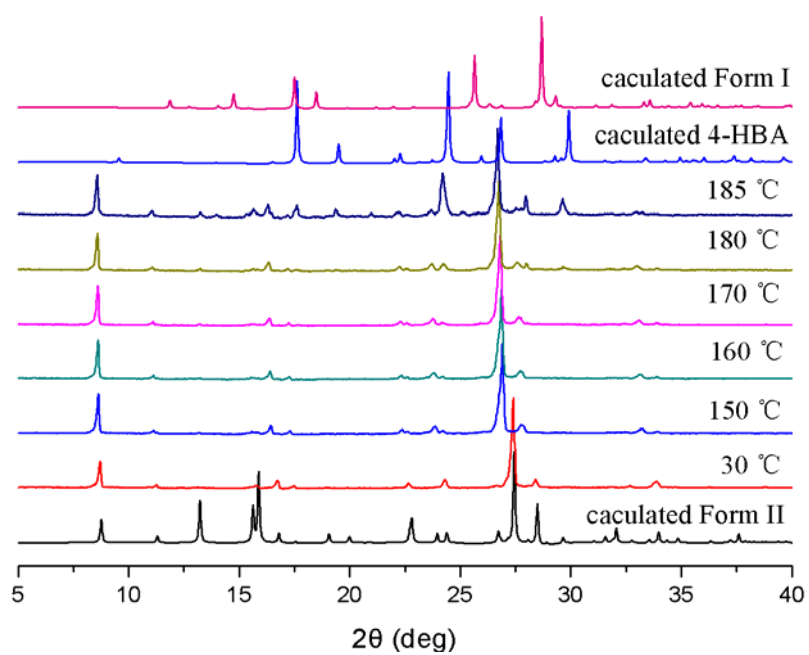

**Fig. S5** VT-PXRD analysis of **Form II**.
